# Supplementary material for: Clenbuterol exerts antidiabetic activity through metabolic reprogramming of skeletal muscle cells
Source: PubMed Central journal article supplement (PMC8748640; doi:10.1038/s41467-021-27540-w), 2022-01-10
Supplement: 41467_2021_27540_MOESM1_ESM.pdf [file 41467_2021_27540_MOESM1_ESM.pdf]

## **Supplemental Information**

### **Clenbuterol exerts antidiabetic activity through metabolic reprogramming of skeletal muscle cells**

Jaroslawnna Meister, Derek B. J. Bone, Jonas R. Knudsen, Luiz F. Barella, Thomas J. Velenosi, Dmitry Akhmedov, Regina J. Lee, Amanda H. Cohen, Oksana Gavrilova, Yinghong Cui, Gerard Karsenty, Min Chen, Lee S. Weinstein, Maximilian Kleinert, Rebecca Berdeaux, Thomas E. Jensen, Erik A. Richter, and Jürgen Wess

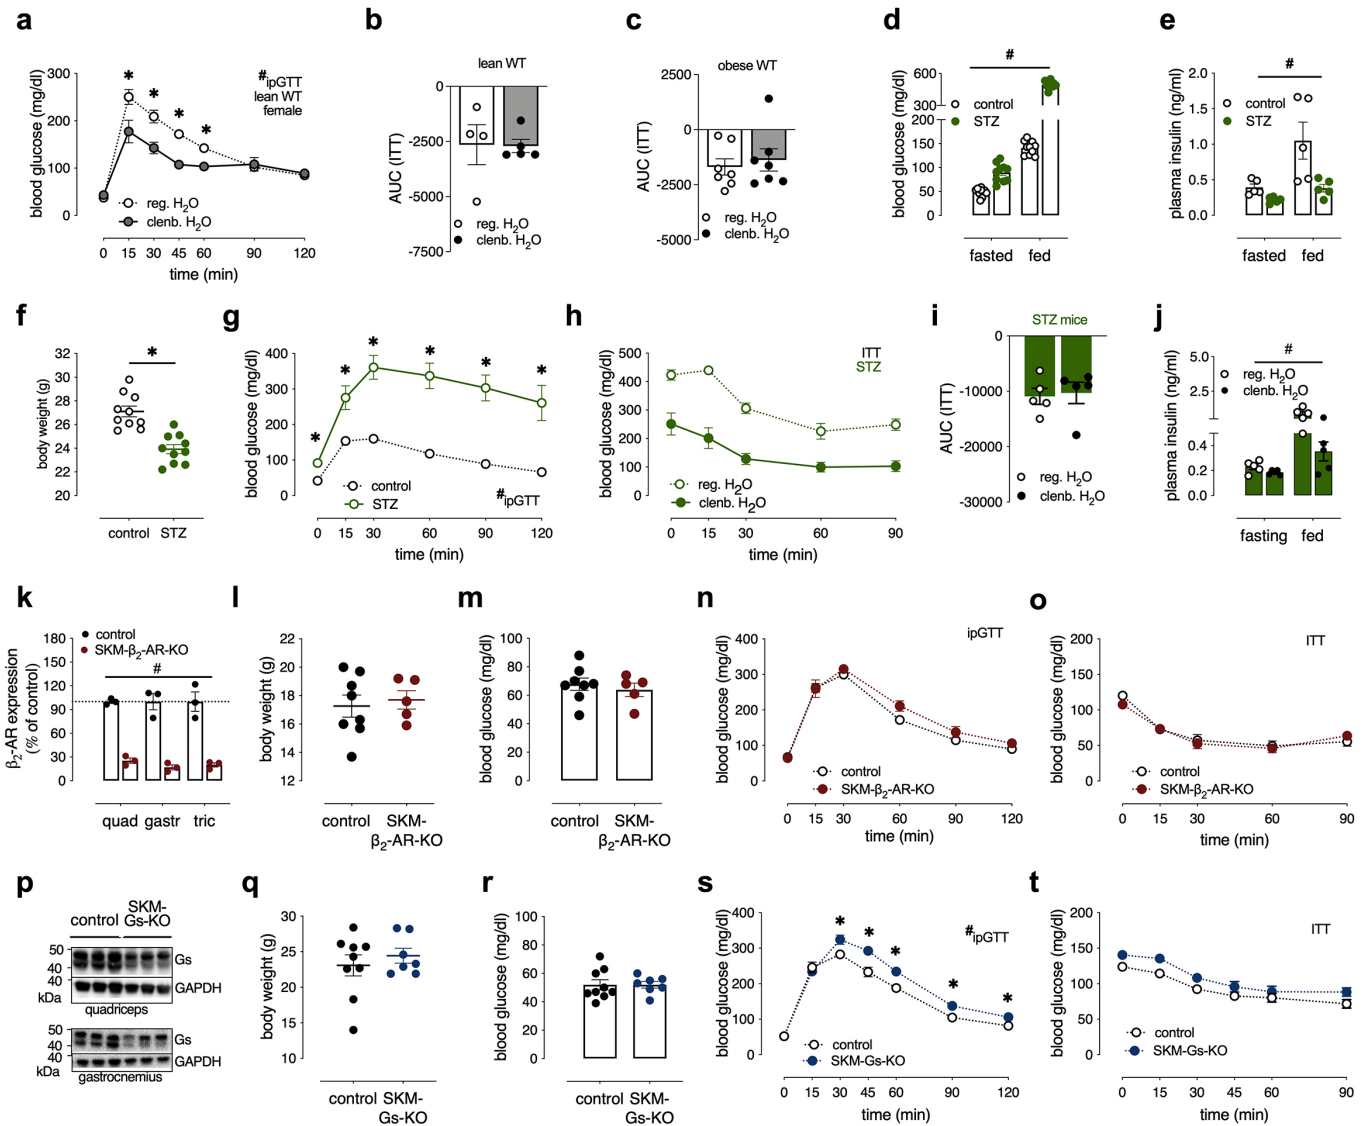

**Supplementary Fig. 1. Metabolic studies with WT, SKM- $\beta_2$ -AR-KO, and SKM-Gs-KO mice.** All studies were carried out with male mice (8-24 weeks old), except for (a).

- (a) Glucose tolerance test (GTT, 2 g/kg glucose i.p.) with lean female WT mice treated with clenbuterol water (clenb. H<sub>2</sub>O) or vehicle (reg. H<sub>2</sub>O) for 5 days (n=7/group). \*p<0.05, unpaired two-tailed Student's t-test, #p<0.05, repeated measure two-way ANOVA, clenbuterol effect.
- (b) Area under the curve (AUC) for insulin tolerance test (ITT) presented in Fig. 1b. AUC was calculated using the initial blood glucose value as baseline. Lean WT mice (fasted for 4 hr) injected i.p. with insulin (0.75 IU/kg) (n=4 on reg. H<sub>2</sub>O, n=5 on clenb. H<sub>2</sub>O)
- (c) AUC for ITT presented in Fig. 1e. AUC was calculated using the initial blood glucose value as baseline. HFD-induced obese WT mice (fasted for 4 hr) injected i.p. with insulin (0.75 IU/kg) (n=7/group).

- (d)** Fasted and fed blood glucose levels in WT mice treated with streptozotocin (STZ) or vehicle (n=10/group). #p<0.05 for STZ effect by two-way ANOVA.
- (e)** Fasted and fed plasma insulin levels in WT mice treated with STZ or vehicle (n=5/group). #p<0.05 for STZ effect (two-way ANOVA).
- (f)** Body weight of WT mice treated with STZ or vehicle (n=10/group). \*p<0.05, unpaired two-tailed Student's t-test.
- (g)** GTT with WT mice treated with STZ or vehicle (n=5/group). \*p<0.05, unpaired two-tailed Student's t-test, #p<0.05, repeated measure two-way ANOVA, STZ effect.
- (h)** ITT with streptozotocin (STZ)-induced diabetic WT mice treated with clenbuterol or regular water for five days and injected with insulin (0.75 IU/kg i.p.) after 4 hr fasting (n=5/group).
- (i)** AUC for ITT presented in panel **(h)**. AUC was calculated using the initial blood glucose value as baseline (n=5/group).
- (j)** Fasting and fed plasma insulin levels in STZ WT mice (n=5/group). #p<0.05 for clenbuterol effect (two-way ANOVA).
- (k)**  $\beta_2$ -AR gene expression levels (determined by qRT-PCR) in various SKM tissues (quadriceps, gastrocnemius and triceps) in lean control and SKM- $\beta_2$ -AR-KO mice (n=3/group). #p<0.05, two-way ANOVA followed by Sidak's posthoc test.
- (l)** Body weight of lean control (n=8) and SKM- $\beta_2$ -AR-KO mice (n=5).
- (m)** Fasting blood glucose levels in lean control (n=8) and SKM- $\beta_2$ -AR-KO mice (n=5).
- (n)** GTT (2 g/kg glucose i.p.) carried out with overnight-fasted control (n=12) and SKM- $\beta_2$ -AR-KO mice (n=7).
- (o)** Insulin tolerance test (ITT, 0.75 IU/kg insulin) performed with 4 hr-fasted control (n=14) and SKM- $\beta_2$ -AR-KO mice (n=6).
- (p)** Immunoblotting analysis of  $G_{\alpha_s}$  protein expression levels in SKM tissues (quadriceps and gastrocnemius) of lean control and SKM-Gs-KO mice (n=3/group).
- (q)** Body weight of lean control (n=9) and SKM-Gs-KO mice (n=7).
- (r)** Fasting blood glucose levels in control (n=9) and SKM-Gs-KO mice (n=7).
- (s)** GTT (2 g/kg glucose i.p.) with overnight-fasted control (n=9) and SKM-Gs-KO mice (n=7). \*p<0.05, unpaired two-tailed Student's t-test, #p<0.05, repeated measure two-way ANOVA, genotype effect.
- (t)** Insulin tolerance test (ITT, 0.75 IU/kg insulin i.p.) with 4 h-fasted control (n=9) and SKM-Gs-KO mice (n=7).

Data are presented as means  $\pm$  s.e.m. Source data are provided as a Source Data file.

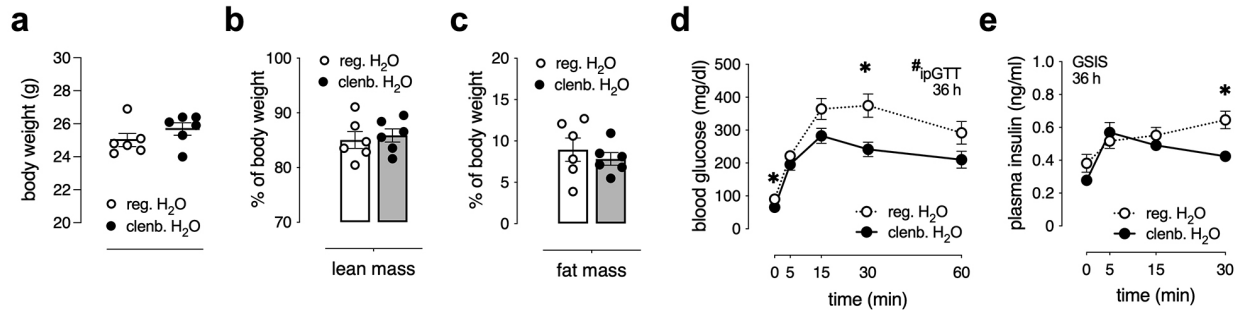

**Supplementary Fig. 2. Metabolic studies with WT mice on clenbuterol water.** All studies were carried out with male mice that were at least 8 weeks old.

**(a-c)** Body weight and body composition of WT mice following treatment with clenbuterol or regular drinking water for 5 days (n=6/group).

**(d, e)** Blood glucose **(d)** and plasma insulin levels **(e)**. Lean overnight-fasted WT mice were injected with glucose (2 g/kg i.p.), following treatment with clenbuterol or regular drinking water for 36 hr (n=8/group). \*p<0.05, unpaired two-tailed Student's t-test, #p<0.05, repeated measure two-way ANOVA, clenbuterol effect.

Data are presented as means  $\pm$  s.e.m. Source data are provided as a Source Data file.

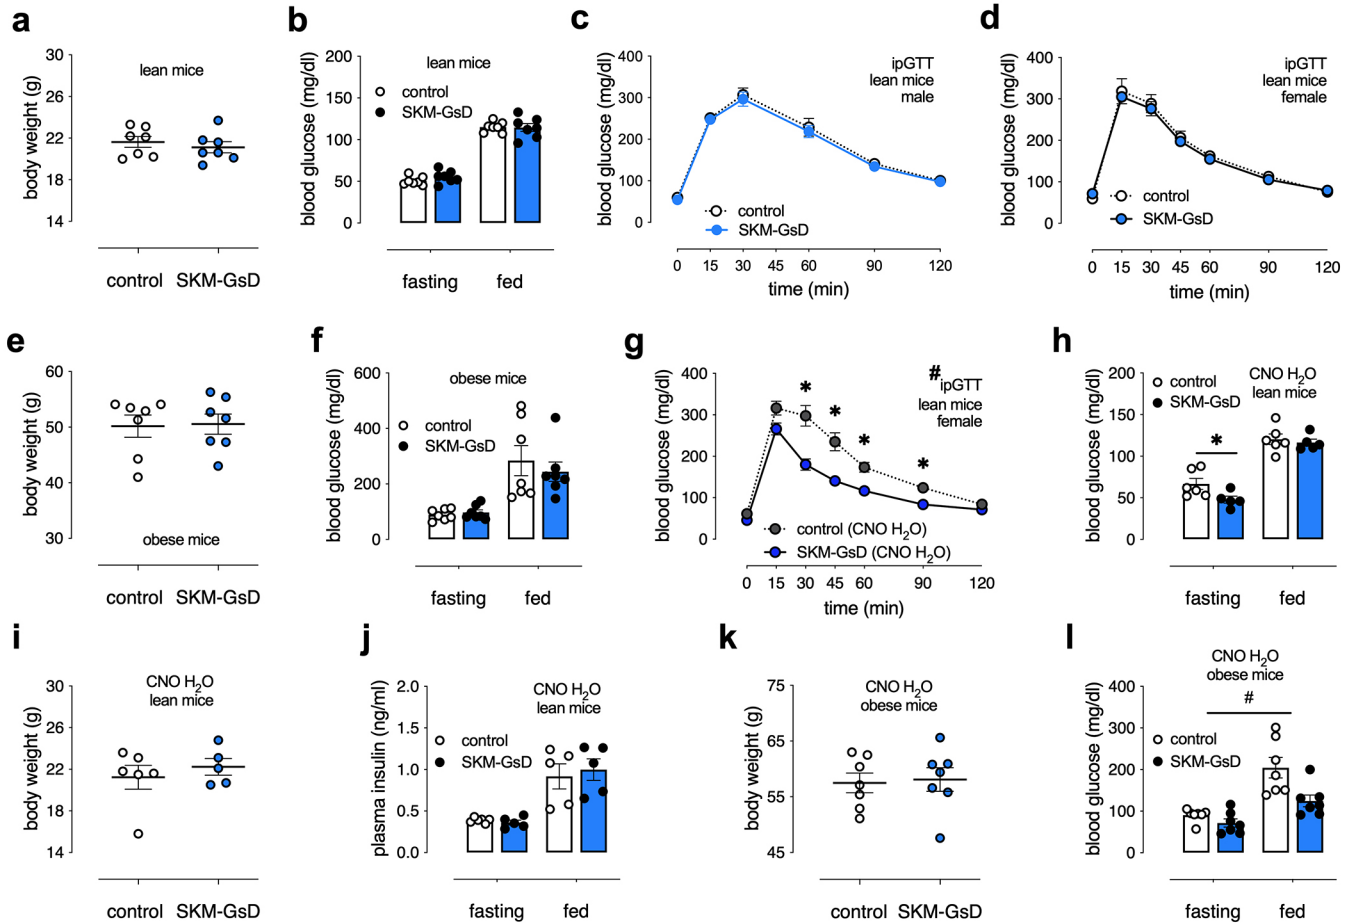

**Supplementary Fig. 3. Metabolic characterization of SKM-GsD mice.** All studies were carried out with male mice (except for (d) and (g)) that were at least 8 weeks old.

- (a) Body weight of lean control and SKM-GsD mice in the absence of CNO (n=7/group).
- (b) Fasting and fed blood glucose levels in control and SKM-GsD mice in the absence of CNO (n=7/group).
- (c) Glucose tolerance test (GTT, 2 g/kg glucose i.p.) carried out with overnight-fasted male control and SKM-GsD mice in the absence of CNO (n=7/group).
- (d) GTT (2 g/kg glucose i.p.) carried out with overnight-fasted female control (n=5) and SKM-GsD mice (n=10) in the absence of CNO.
- (e) Body weight of HFD-induced obese control and SKM-GsD mice (8 weeks on HFD) in the absence of CNO (n=7/group).
- (f) Fasting and fed blood glucose levels in HFD-induced obese control and SKM-GsD mice in absence of CNO (n=7/group).
- (g) GTT (2 g/kg glucose i.p.) carried out with overnight-fasted female control (n=5) and SKM-GsD mice (n=10) maintained on CNO (250 mg/l) drinking water for one week. \*p<0.05, unpaired two-tailed Student's t-test, #p< 0.05, repeated measure two-way ANOVA, genotype effect.
- (h) Fasting and fed blood glucose levels in lean control (n=6) and SKM-GsD mice (n=5) on CNO drinking water for one week. \*p<0.05, unpaired two-tailed Student's t-test.

- (i) Body weight of lean control (n=6) and SKM-GsD mice (n=5) maintained on CNO (250 mg/l) drinking water for one week.
- (j) Fasting and fed plasma insulin levels in lean control (n=6) and SKM-GsD mice (n=5) maintained on CNO drinking water for one week.
- (k) Body weight of HFD-induced obese control and SKM-GsD mice maintained on CNO drinking water for one week (n=7/group).
- (l) Fasting and fed blood glucose levels in HFD-induced obese control and SKM-GsD mice maintained on CNO drinking water for one week (n=7/group). #p<0.05 for genotype effect (two-way ANOVA).

Data are presented as means  $\pm$  s.e.m. Source data are provided as a Source Data file.

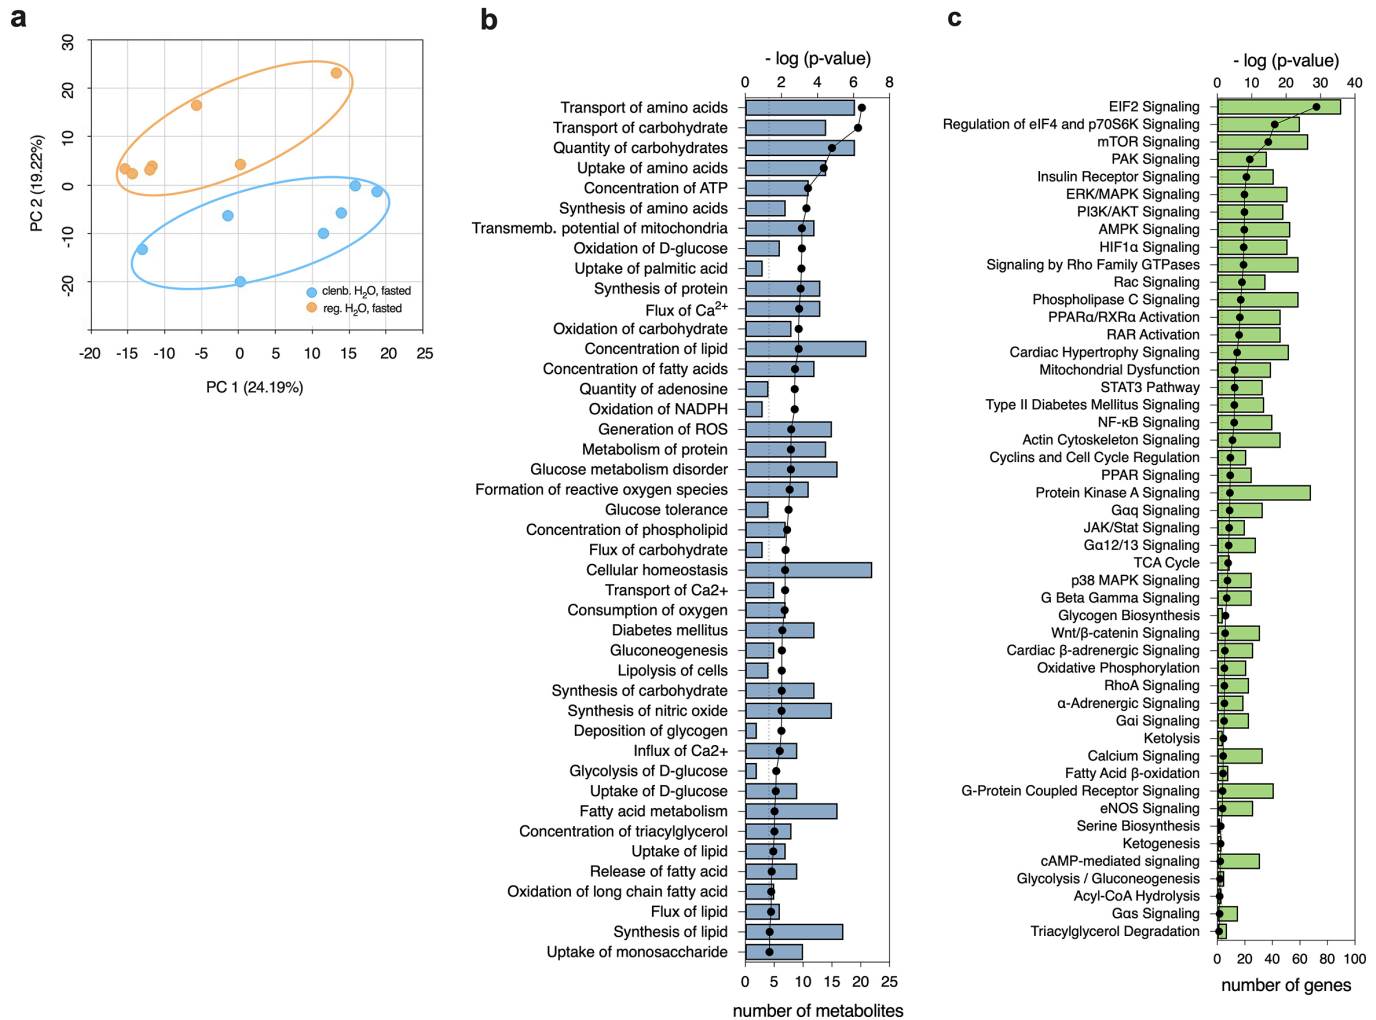

**Supplementary Fig. 4. Pathway analysis of metabolomic and RNA-Seq studies with WT mice on clenbuterol drinking water.** Prior to metabolomics and gene expression studies, lean WT mice consumed drinking water containing clenbuterol (30 mg/l; clenb. H<sub>2</sub>O) or regular drinking water (reg. H<sub>2</sub>O) for 5 days. All studies were carried out with male mice that were 12 weeks old.

- (a) Principal component analysis based on detected metabolite levels in quadriceps muscle of fasted WT mice (n=7/group) consuming clenbuterol versus regular drinking water for 5 days.
- (b) Pathway analysis of significantly different metabolites in quadriceps muscle of fasted WT mice (n=7/group) treated with clenbuterol compared to regular water treated mice, determined via Ingenuity Pathway Analyzer (Qiagen).
- (c) Enrichment of signaling pathways of differentially expressed genes in quadriceps muscle of clenbuterol water treated mice compared to regular water treated mice. Differential gene expression was determined in SKM samples from overnight fasted (15 hr) and freely fed mice using DESeq2 via Genomatix Genome Analyzer. Pathway enrichment analysis was performed with genes that were differentially expressed in both, fasted and fed mice (total of 2817 common genes, adjusted p-value <0.05, two-tailed Wald-Test (DESeq2), n=5/group) using Ingenuity Pathway Analyzer (Qiagen).

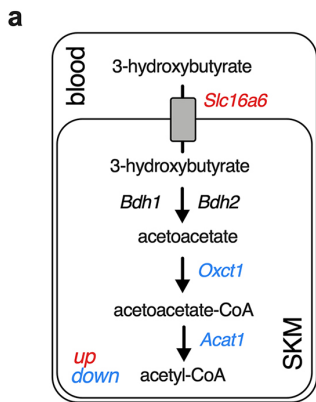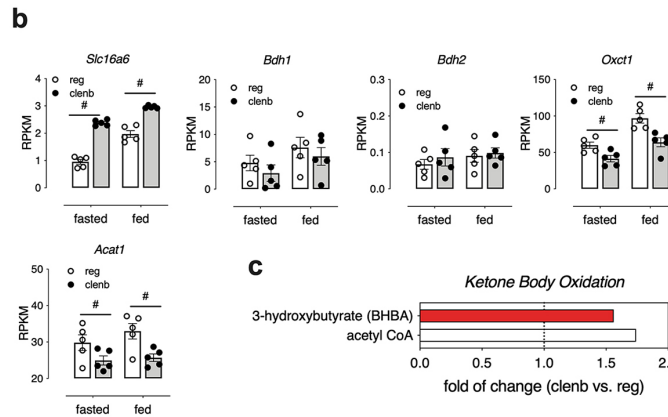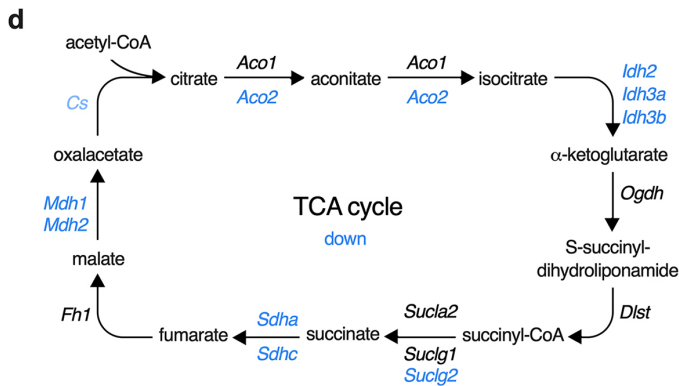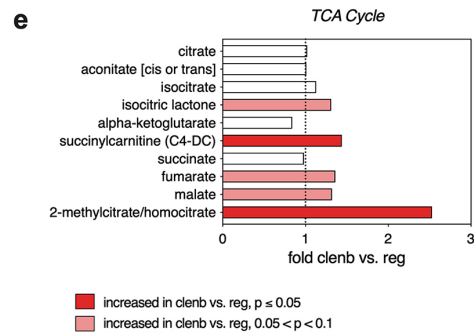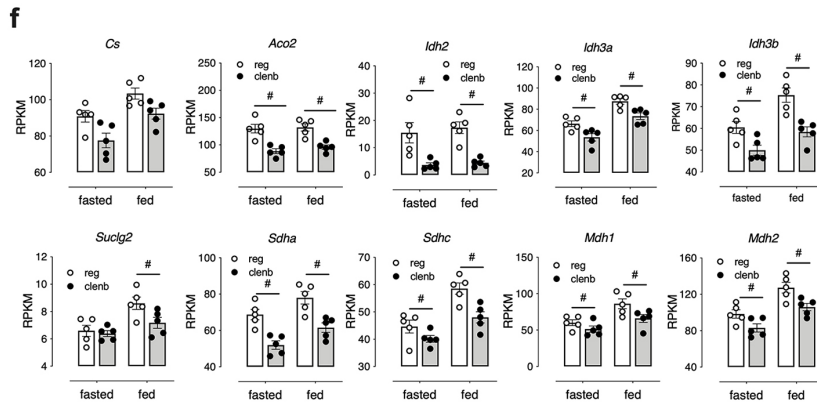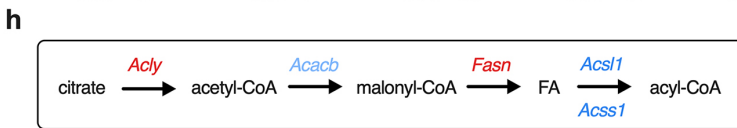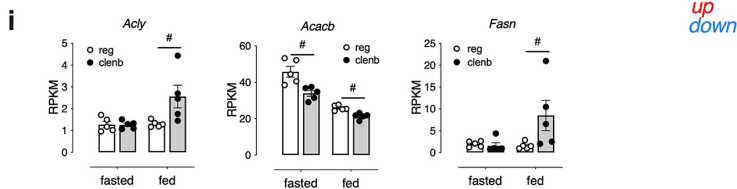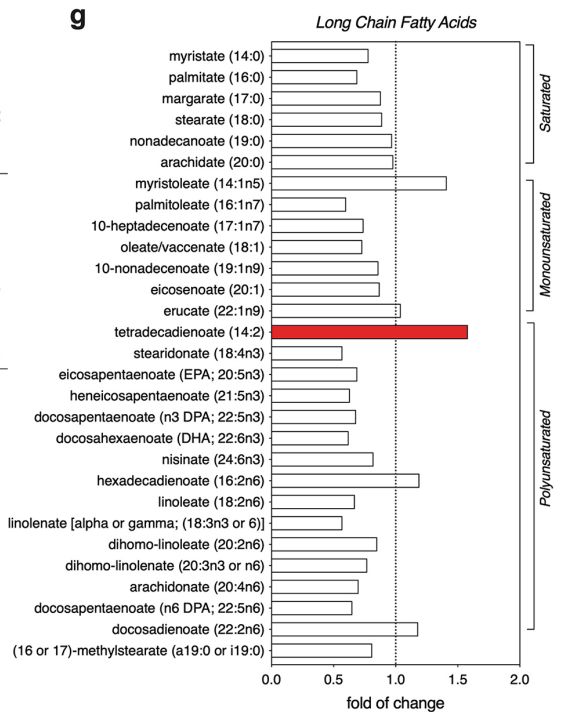



**Supplementary Fig. 5. Changes in SKM ketone body oxidation, TCA cycle metabolites and long chain fatty acids following chronic clenbuterol treatment of WT mice.** All studies were carried out with male mice maintained on regular chow (age: ~12 weeks).

- (a) Graphic representation of differentially expressed genes within the ketone body oxidation pathway in SKM (quadriceps muscle). Prior to gene expression analyses, lean WT mice were maintained on regular drinking water or clenbuterol water for 5 days. Red and blue labeled genes indicate significant up- or down-regulation, respectively.
- (b) Gene expression levels (RPKM) of SKM transcripts involved in the ketone body oxidation pathway. RNA-Seq data were analyzed using the Genomatix Genome Analyzer platform. #Significantly regulated (two-tailed Wald test (DESeq2), adjusted p-value <0.05) (n=5/group).
- (c) Fold change of 3-hydroxybutyrate and acetyl-CoA levels in SKM of overnight fasted WT mice maintained on clenbuterol vs. regular drinking water for 5 days, determined by metabolomics (n=7/group). The red bar indicates significant upregulation (two-way ANOVA contrasts); also see insert below panel (e) for color code).
- (d) Graphic representation of differentially expressed genes within the TCA cycle pathway in SKM of overnight fasted WT mice maintained on regular drinking water vs. clenbuterol water. Blue labeled genes indicate significant downregulation.
- (e) Fold change of TCA cycle metabolites in SKM of overnight fasted WT mice maintained on clenbuterol water vs. regular drinking water, determined by metabolomics (n=7/group). The red bars indicate significant upregulation (two-way ANOVA contrasts).
- (f) Gene expression levels (RPKM) of SKM transcripts involved in the TCA cycle pathway. RNA-Seq expression data were analyzed using the Genomatix Genome Analyzer platform. #Significantly regulated (two-tailed Wald test (DESeq2), adjusted p-value <0.05) (n=5/group).
- (g) Fold change of levels of long chain fatty acids present in SKM of overnight fasted WT mice maintained on clenbuterol water vs. regular drinking water, determined by metabolomics (n=7/group). The red bar indicates significant upregulation (two-way ANOVA contrasts; also see insert below panel (e) for color code).
- (h) Graphic representation of differentially expressed genes within the fatty acid synthesis pathway in SKM of WT mice maintained on clenbuterol water vs. regular drinking water. Red and blue labeled genes indicate significant up- or down-regulation, respectively.
- (i) Gene expression levels (RPKM) of SKM transcripts involved in the fatty acid synthesis pathway. RNA-Seq expression data were analyzed using Genomatix Genome Analyzer platform. #Significantly regulated (two-tailed Wald test (DESeq2), adjusted p-value <0.05) (n=5/group).

Data are presented as means  $\pm$  s.e.m. (b, f, i). Source data are provided as a Source Data file.

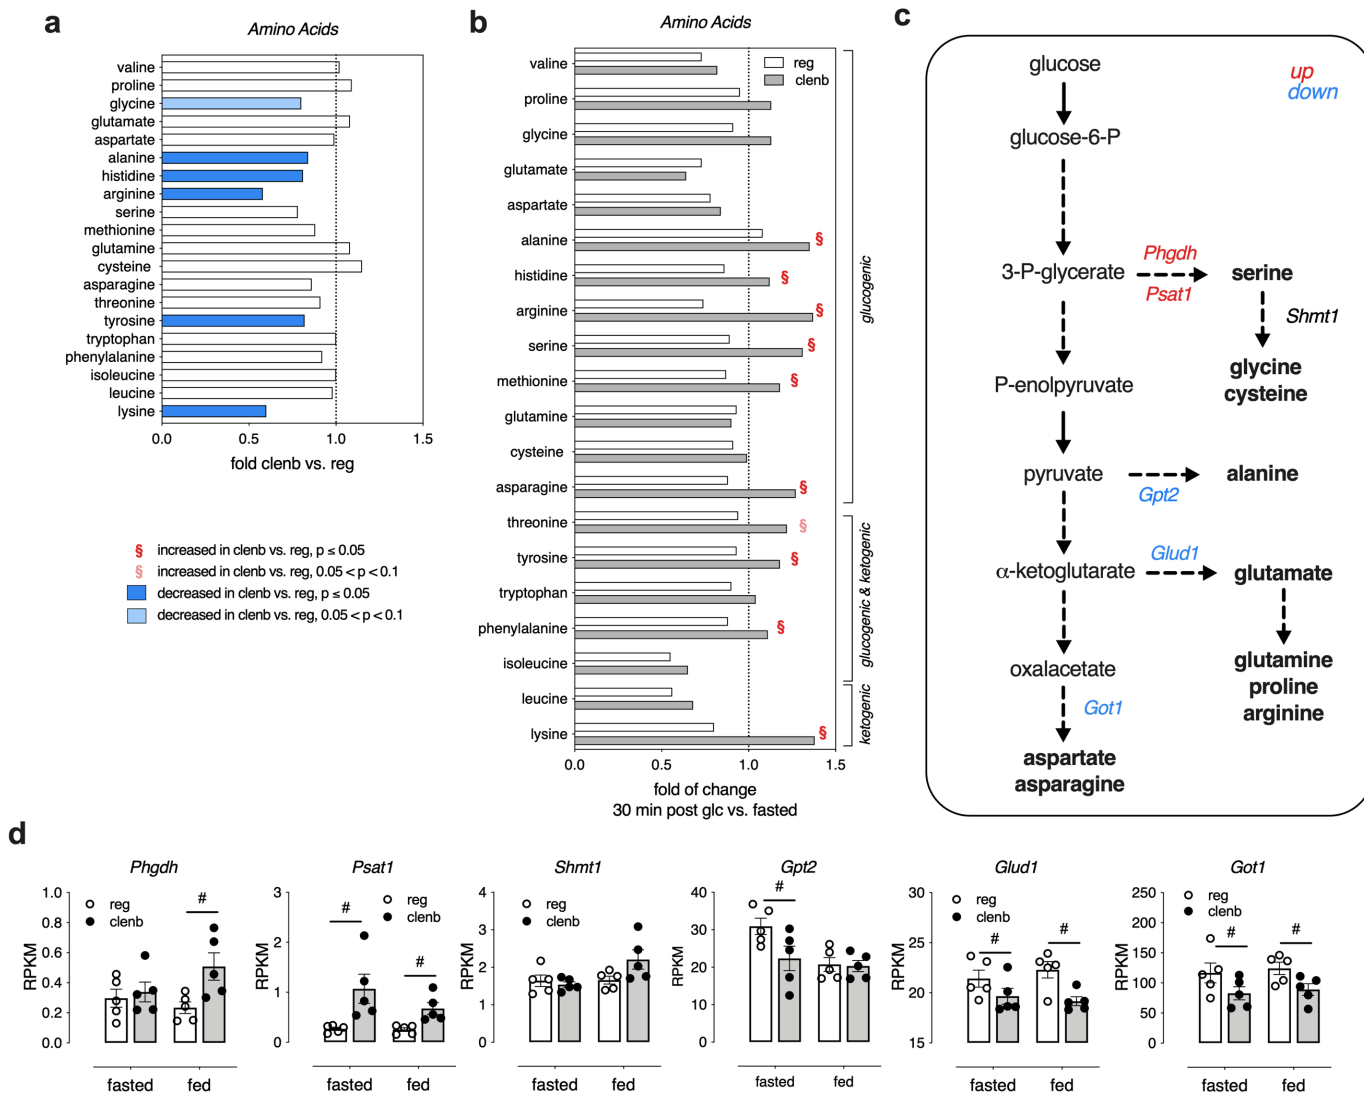

**Supplementary Fig. 6. Changes in SKM amino acid metabolism following chronic clenbuterol treatment of WT mice.** All studies were carried out with male mice maintained on regular chow (age: ~12 weeks).

(a) Fold change of amino acid levels in SKM (quadriceps muscle) of WT mice. Metabolomics studies were carried out with WT mice (after a 15hr fast,  $n=7$ /group) maintained on regular drinking water or clenbuterol water for 5 days. Blue bars indicate significant downregulation (two-way ANOVA contrasts). As indicated in the insert below panel (a), the color code represents a significant up- or down-regulation (use of two-way ANOVA contrast) of metabolites (red or blue, respectively). §Significant interaction effect between clenbuterol and glucose treatment (two-way ANOVA), also see panel (b).

(b) Fold changes in SKM metabolites 30 min after a glucose bolus (2 g/kg i.p.) compared to the fasted state (30 min post glucose (glc) versus fasted). § $p < 0.05$  for interaction effect between clenbuterol and glucose treatment (two-way ANOVA, see insert below panel (a) for color code).

- (c) Scheme of glycolysis and TCA pathways generating non-essential amino acids. Red and blue labeled genes indicate significant up- or down-regulation, respectively.
- (d) Expression levels (RPKM) of selected SKM transcripts involved in transamination pathways. RNA-Seq expression data were analyzed using the Genomatix Genome Analyzer platform. #Significantly regulated (two-tailed Wald test (DESeq2), adjusted p-value <0.05) (n=5/group). Data are presented as means  $\pm$  s.e.m. Source data are provided as a Source Data file.

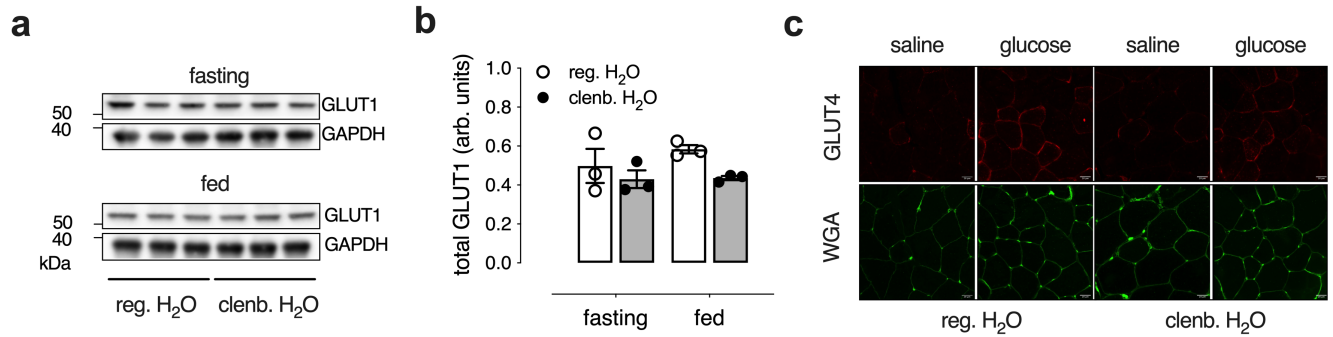

**Supplementary Fig. 7. Glucose transporter protein levels in SKM following chronic clenbuterol treatment.**

- (a) GLUT1 protein expression in fasted and fed WT mice (males) following chronic clenbuterol or vehicle treatment 5 days (n=3/group).
- (b) Quantification of the western blots shown in (a). Data are presented as means  $\pm$  s.e.m.
- (c) Representative images of GLUT4 translocation analysis (Fig. 3e). Following consumption of clenbuterol (30 mg/l) water or regular drinking water for 5 days, WT mice were fasted overnight and injected with glucose (2 g/kg i.p.) or saline. Quadriceps muscle samples were collected 15 min later. Five sections were analyzed per mouse (n=5 mice/group). Source data are provided as a Source Data file.

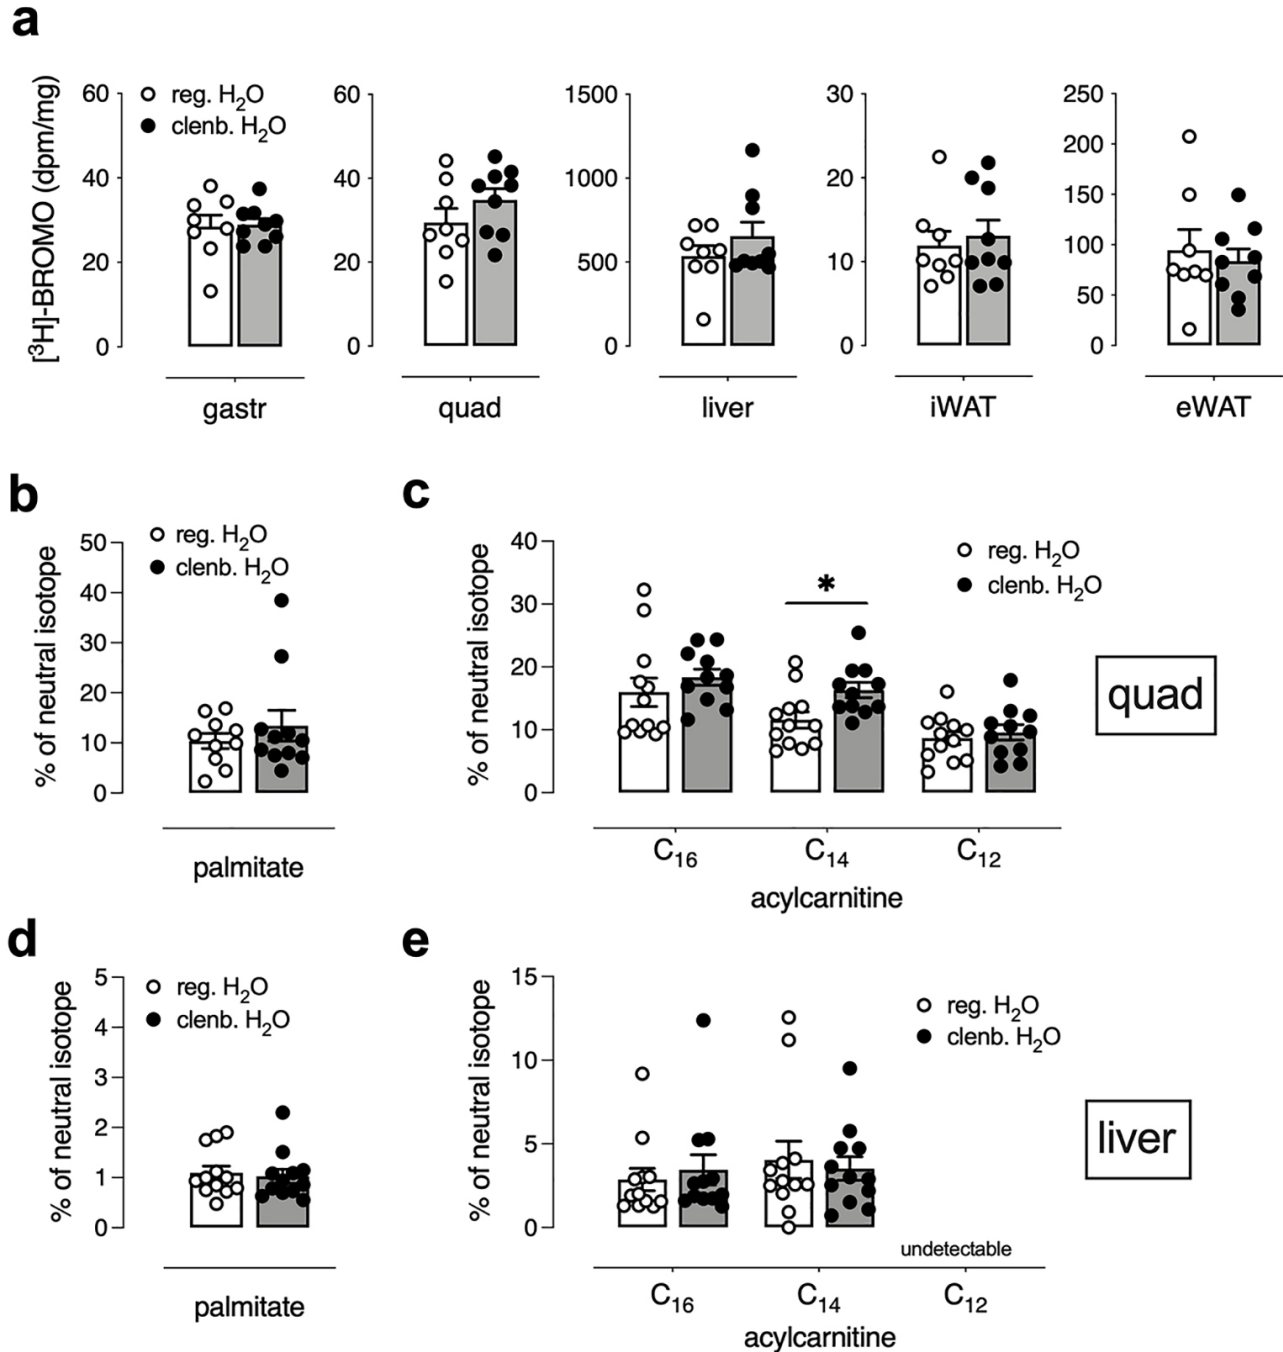

**Supplementary Fig. 8. Fatty acid metabolism in SKM following chronic clenbuterol treatment.** All studies were carried out with male mice that were 12-14 weeks old. Prior to isotope injection studies, lean WT mice consumed drinking water containing clenbuterol (30 mg/l; clenb. H<sub>2</sub>O; n=8) or regular drinking water (reg. H<sub>2</sub>O; n=9) for 5 days. Fatty acid uptake was determined in selected tissues 1 hr following the injection of [9,10-<sup>3</sup>H]-(R)-2-bromopalmitate ([<sup>3</sup>H]-BROMO, 2 μCi, i.p.). (b-e) Overnight fasted mice were injected with [U-<sup>13</sup>C]-palmitate (50 ug/kg, i.p.), and tissues were collected 25 min after the injection (n=12/group).

- (a) Amount of  $^{13}\text{C}$ -labeled palmitate in quadriceps muscle.
- (b) Amount of selected  $^{13}\text{C}$ -labeled acylcarnitines in quadriceps muscle.
- (c) Amount of  $^{13}\text{C}$ -labeled palmitate in liver.
- (e) Amount of selected  $^{13}\text{C}$ -labeled acylcarnitines in liver.

Data are presented as means  $\pm$  s.e.m. \* $p < 0.05$ , unpaired two-tailed Student's t-test (neutral isotope= $^{12}\text{C}$ ).

Gastr, gastrocnemius muscle; quad., quadriceps muscle. Source data are provided as a Source Data file.

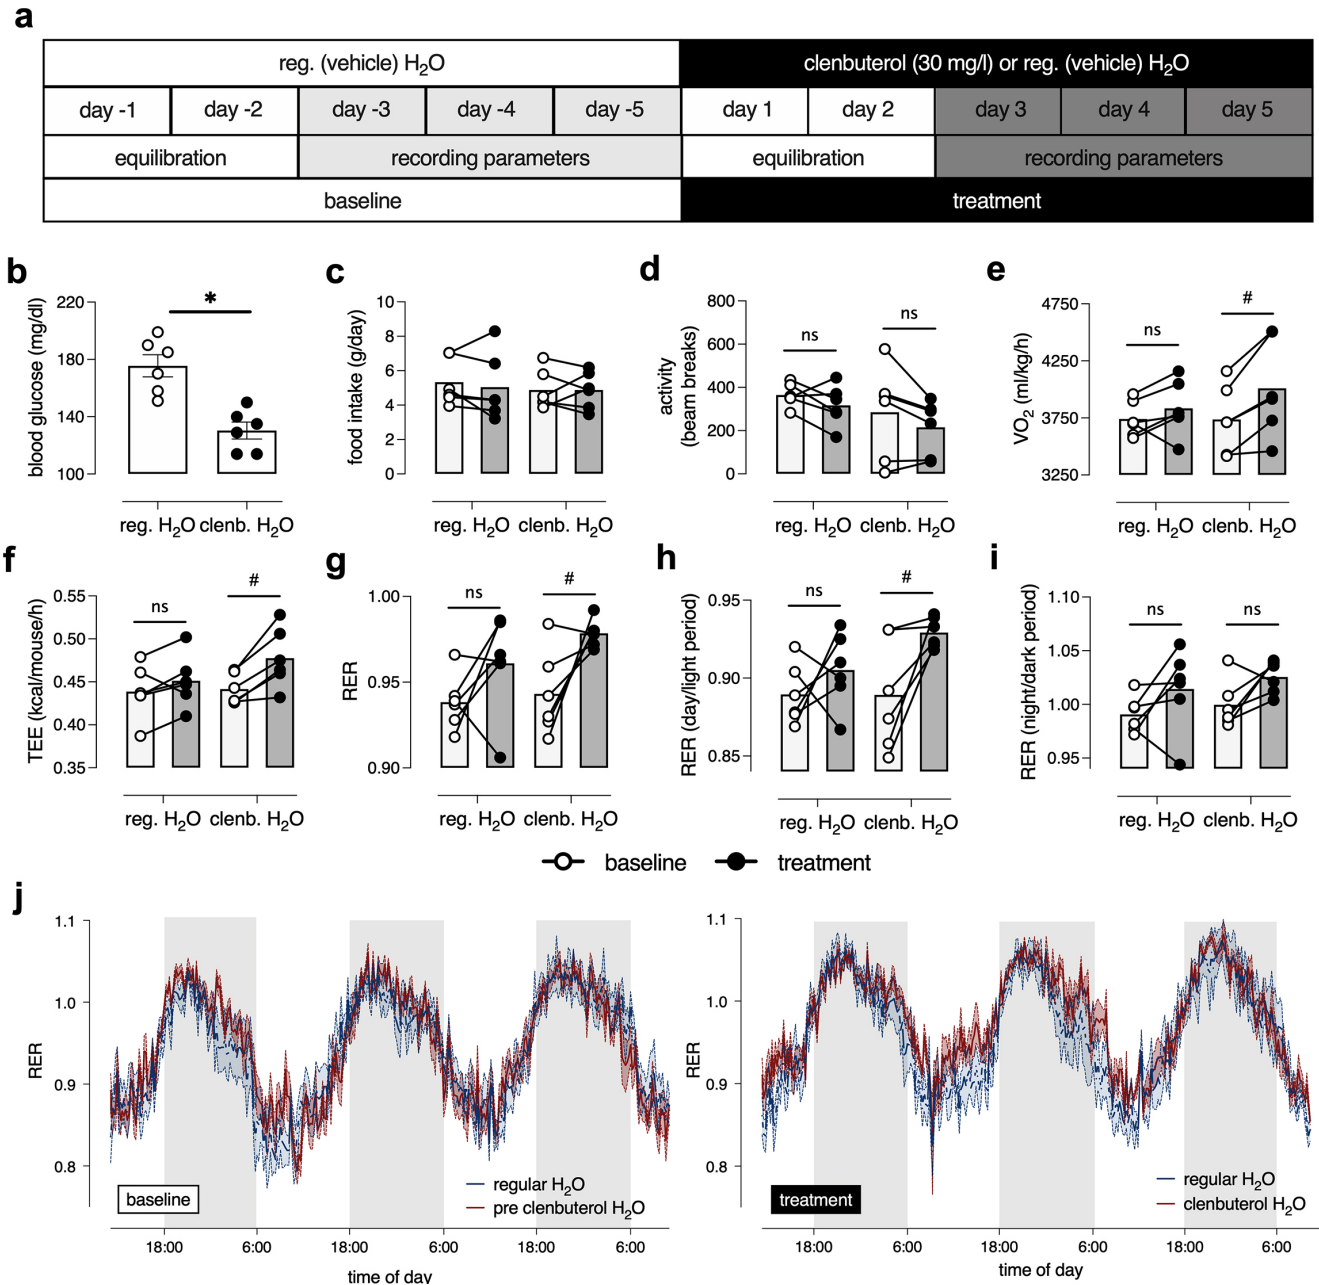

**Supplementary Fig. 9. Indirect calorimetry measurements with WT mice following chronic clenbuterol treatment.** All studies were carried out with male mice that were ~12 weeks old.

(a) Experimental set-up. Lean WT mice maintained on regular drinking water were placed in metabolic chambers. After a 2-day equilibration period, several metabolic parameters were monitored for 3 consecutive days (baseline). Subsequently, 6 of the mice were randomly assigned to a 5-day clenbuterol (30 mg/l) water treatment. Measurements were recorded for the 3 last days of treatment. Baseline and treatment data are represented as averages of 3 days for each mouse (n=6/group).

(b) Blood glucose levels, fed, \*p< 0.05, unpaired two-tailed Student's t-test

- (c) Food intake measurements.
- (d) Locomotor activity.
- (e) Oxygen consumption ( $\text{VO}_2$ ).
- (f) Total energy expenditure (TEE).
- (g) Respiratory exchange ratio (RER).
- (h) RER for daytime (light period).
- (i) RER for nighttime (dark period).
- (j) RER time traces for baseline (left panel) and treatment (right panel) periods. Data are presented as means  $\pm$  s.e.m.

Data are presented as means  $\pm$  s.e.m. #P < 0.05 by repeated measure two-way ANOVA, followed by Sidak's posthoc test. Source data are provided as a Source Data file.



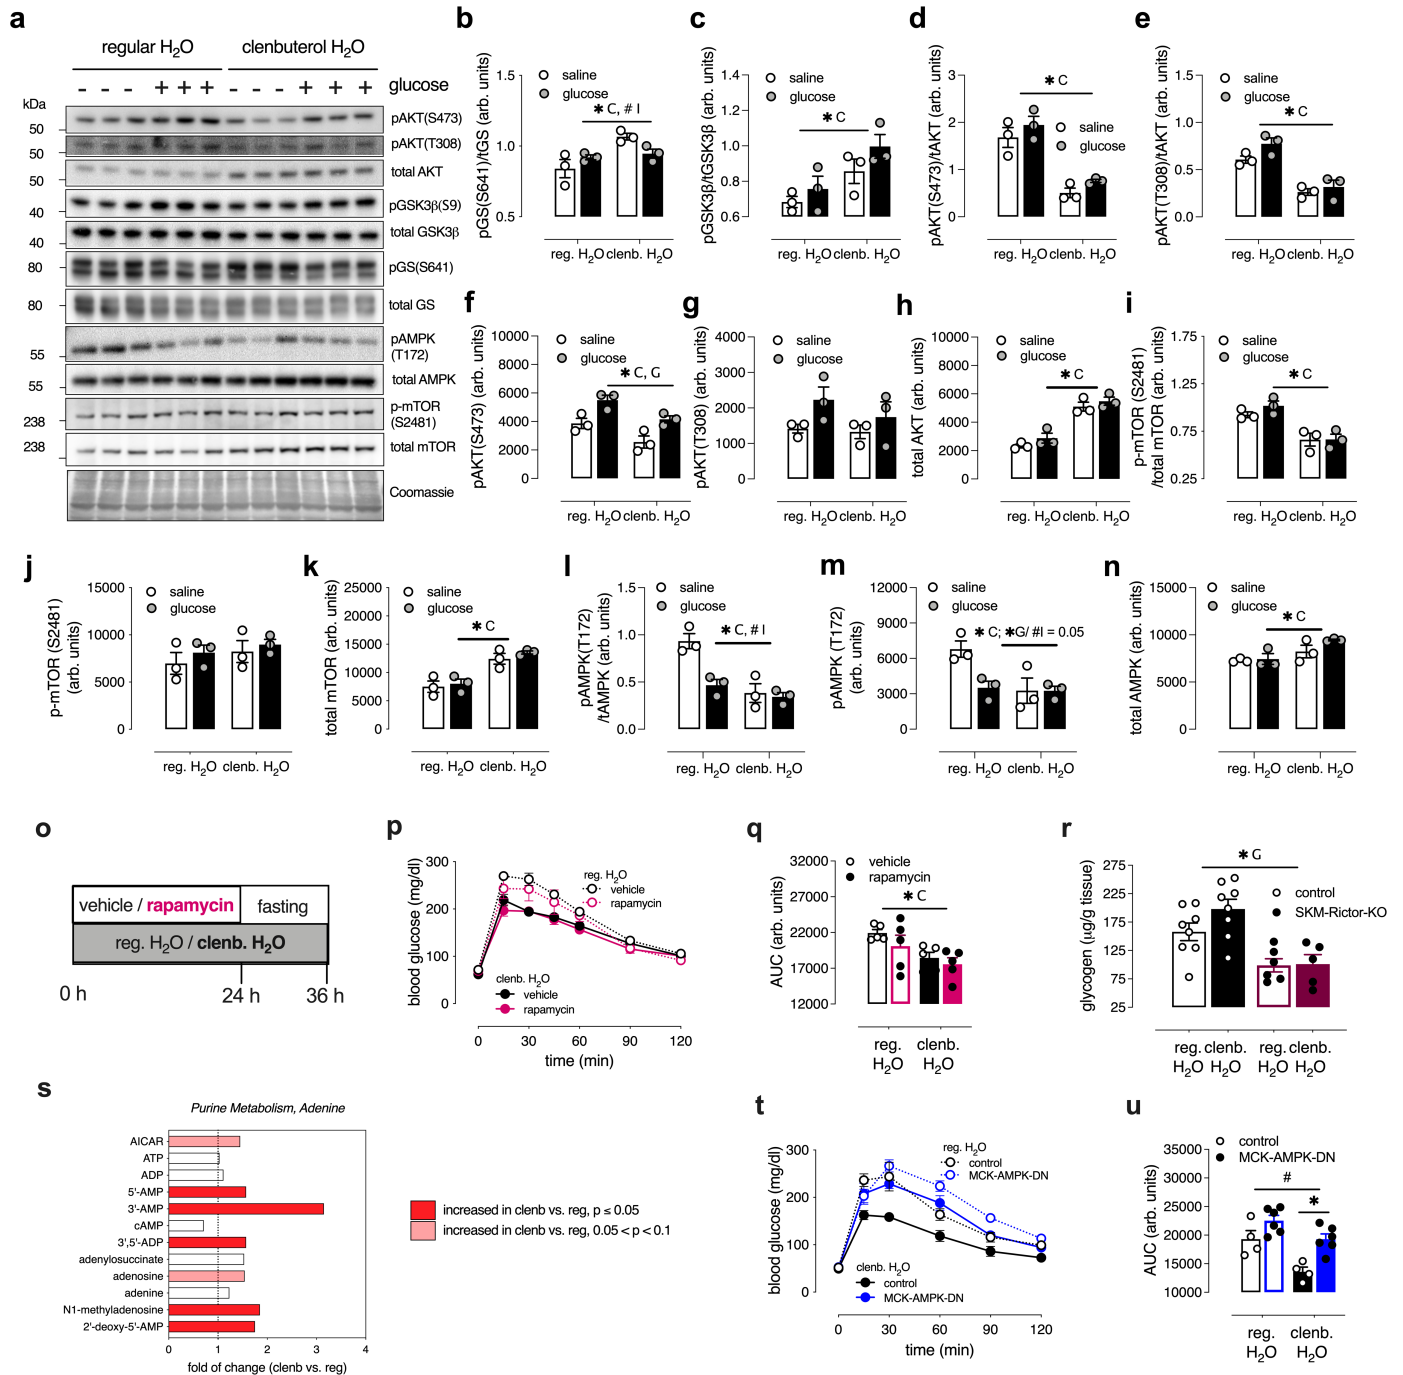

**Supplementary Fig. 10. Studies involving mTORC and AMPK signaling.** All studies were carried out with male mice.

**(a)** Western blotting studies. Following consumption of clenbuterol water (30 mg/l, clenb.) or regular drinking water (reg.) for 5 days, mice were fasted overnight and injected with glucose (2 g/kg i.p.). Quadriceps muscle samples were collected 30 min later.

**(b-n)** Quantification of the western blots shown in panel (a) (n = 3/group). \*C, p<0.05 for clenbuterol effect;

\*G,  $p < 0.05$  for glucose effect (two-way ANOVA); #I,  $p < 0.05$  for interaction effect between glucose and clenbuterol treatment.

- (o) Experimental set-up for mTORC1 inhibition by rapamycin. Lean WT mice were randomly assigned to four treatment groups. To avoid inhibition of mTORC2, rapamycin was given for 24 hr only (10 mg/l in drinking water), while the clenbuterol treatment (30 mg/l) continued for another 12 hr for a total treatment period of 36 h.
- (p) Glucose tolerance test (GTT) with overnight fasted WT mice injected with glucose (2 g/kg i.p.) following the treatment protocol illustrated in panel (a) (n=5/group).
- (q) Area under the curve (AUC) representation of the GTT data presented in (B). \*C,  $p < 0.05$  for clenbuterol effect (two-way ANOVA).
- (r) Glycogen levels in SKM (gastrocnemius muscle) of freely fed control (n = 8) and SKM-Rictor-KO mice (n = 6) consuming regular drinking water or clenbuterol water for 5 days. \*G,  $p < 0.05$  for genotype effect (two-way ANOVA).
- (s) Fold change of adenine derivative levels in SKM of WT mice consuming clenbuterol water versus regular drinking water, following a 15-h fast, determined by metabolomics (n=7/group). See insert next to panel for color code explanation (use of two-way ANOVA contrasts for statistical significance).
- (t) GTT with overnight-fasted control (n = 4) and SKM-AMPK-DN mice (n = 6) treated with reg. H<sub>2</sub>O or clenb. H<sub>2</sub>O for 5 days.
- (u) AUC representation of the GTT data shown in (M). #p<0.05 for clenbuterol effect (two-way ANOVA); \*p<0.05 (two-way ANOVA, followed by Sidak's posthoc test).

Data are presented as means  $\pm$  s.e.m. Source data are provided as a Source Data file.

**Supplementary Table 1. Expression analysis of selected transcripts involved in major metabolic pathways following chronic clenbuterol treatment of control and SKM-Rictor-KO mice**

|                            | Control regular H <sub>2</sub> O |            | SKM-Rictor-KO regular H <sub>2</sub> O |            | Control clenbuterol H <sub>2</sub> O |            | SKM-Rictor-KO clenbuterol H <sub>2</sub> O |            |
|----------------------------|----------------------------------|------------|----------------------------------------|------------|--------------------------------------|------------|--------------------------------------------|------------|
|                            | RPKM (mean)                      | RPKM (SEM) | RPKM (mean)                            | RPKM (SEM) | RPKM (mean)                          | RPKM (SEM) | RPKM (mean)                                | RPKM (SEM) |
| <b>Glycolysis</b>          |                                  |            |                                        |            |                                      |            |                                            |            |
| <i>Slc2a1</i>              | 1.8                              | 0.2        | 1.8                                    | 0.2        | 1.8                                  | 0.2        | 1.3                                        | 0.1        |
| <i>Slc2a4</i>              | 104.6                            | 2.6        | 96.2                                   | 5.0        | 93.4                                 | 3.7        | 85.1                                       | 2.4        |
| <i>Hk2</i>                 | 40.7                             | 1.6        | 33.3                                   | 1.8        | 38.0                                 | 2.2        | 32.3                                       | 2.3        |
| <i>Gpi1</i>                | 56.7                             | 1.8        | 59.0                                   | 2.0        | 66.3                                 | 4.1        | 69.4                                       | 5.4        |
| <i>Pfkm</i>                | 662.8                            | 16.3       | 609.9                                  | 14.8       | 649.1                                | 29.7       | 610.3                                      | 27.1       |
| <i>Aldoa</i>               | 2177.9                           | 58.6       | 2164.1                                 | 55.0       | 2463.3                               | 64.8       | 2621.4*                                    | 97.7       |
| <i>Gapdh</i>               | 2230.9                           | 68.1       | 2366.8                                 | 61.2       | 2596.2*                              | 59.5       | 2939.6*                                    | 116.2      |
| <i>Pgk1</i>                | 16.9                             | 1.0        | 18.3                                   | 1.2        | 26.1*                                | 2.7        | 29.5*                                      | 2.5        |
| <i>Pgam2</i>               | 1403.4                           | 49.1       | 1596.2                                 | 95.1       | 1632.5                               | 92.9       | 1856.1                                     | 126.1      |
| <i>Eno1</i>                | 2.8                              | 0.2        | 3.9                                    | 0.2        | 3.7*                                 | 0.3        | 4.1                                        | 0.4        |
| <i>Eno3</i>                | 843.0                            | 19.9       | 977.4                                  | 47.2       | 1068.6                               | 118.2      | 1225.4                                     | 102.7      |
| <i>Pkm</i>                 | 226.8                            | 3.6        | 221.2                                  | 6.1        | 231.3                                | 9.1        | 231.2                                      | 9.6        |
| <i>Pdha1</i>               | 126.2                            | 5.9        | 118.8                                  | 5.4        | 137.0                                | 6.3        | 147.4*                                     | 4.9        |
| <i>Pdhx</i>                | 10.1                             | 0.2        | 10.7                                   | 0.3        | 11.0                                 | 0.5        | 11.9                                       | 0.4        |
| <i>Pdk1</i>                | 4.8                              | 0.2        | 4.6                                    | 0.3        | 3.8*                                 | 0.2        | 3.8                                        | 0.3        |
| <i>Pdk2</i>                | 116.5                            | 3.0        | 125.2                                  | 2.8        | 84.1*                                | 2.1        | 92.3*                                      | 2.1        |
| <i>Pdk4</i>                | 126.5                            | 25.5       | 155.8                                  | 25.3       | 57.0                                 | 11.9       | 91.1*                                      | 9.7        |
| <i>Ldha</i>                | 413.3                            | 11.2       | 423.8                                  | 21.1       | 502.3                                | 38.5       | 520.7                                      | 33.8       |
| <i>Ldhb</i>                | 48.5                             | 5.4        | 43.1                                   | 7.0        | 20.6*                                | 5.4        | 19.2*                                      | 3.0        |
| <i>Ldhd</i>                | 9.8                              | 0.5        | 10.9                                   | 0.8        | 7.5*                                 | 0.2        | 8.1*                                       | 0.3        |
| <b>Glycogen metabolism</b> |                                  |            |                                        |            |                                      |            |                                            |            |
| <i>Gyg</i>                 | 110.6                            | 3.2        | 91.9                                   | 1.9        | 75.9*                                | 3.5        | 69.5*                                      | 1.9        |
| <i>Gys1</i>                | 73.4                             | 1.9        | 69.1                                   | 3.4        | 55.5*                                | 4.0        | 54.2                                       | 4.2        |
| <i>Gsk3b</i>               | 4.4                              | 0.1        | 3.6                                    | 0.1        | 3.6*                                 | 0.2        | 3.3                                        | 0.1        |
| <i>Ppp1r1a</i>             | 8.5                              | 0.5        | 19.6                                   | 2.4        | 5.6*                                 | 0.4        | 12.4*                                      | 1.1        |
| <b>Ketone oxidation</b>    |                                  |            |                                        |            |                                      |            |                                            |            |
| <i>Slc16a6</i>             | 2.1                              | 0.1        | 1.9                                    | 0.1        | 1.4*                                 | 0.1        | 1.3*                                       | 0.1        |
| <i>Bdh1</i>                | 9.2                              | 1.2        | 7.3                                    | 1.3        | 9.3                                  | 3.0        | 7.0                                        | 1.2        |
| <i>Bdh2</i>                | 0.1                              | 0.0        | 0.1                                    | 0.0        | 0.1                                  | 0.0        | 0.1                                        | 0.0        |
| <i>Oxct1</i>               | 59.0                             | 3.5        | 65.1                                   | 2.7        | 45.5                                 | 4.4        | 54.0*                                      | 1.8        |
| <b>TCA cycle</b>           |                                  |            |                                        |            |                                      |            |                                            |            |

|                    |       |     |       |      |        |     |        |     |
|--------------------|-------|-----|-------|------|--------|-----|--------|-----|
| <i>Cs</i>          | 96.4  | 1.1 | 104.5 | 3.1  | 86.9   | 3.2 | 92.2   | 1.7 |
| <i>Aco2</i>        | 225.0 | 7.2 | 232.8 | 10.5 | 161.0* | 8.2 | 168.9* | 6.5 |
| <i>Idh2</i>        | 47.6  | 3.6 | 48.9  | 6.0  | 14.4*  | 3.0 | 16.5*  | 2.7 |
| <i>Idh3a</i>       | 70.6  | 2.0 | 74.3  | 2.6  | 61.9   | 3.9 | 66.1   | 2.2 |
| <i>Idh3b</i>       | 64.2  | 1.7 | 67.6  | 1.9  | 50.9*  | 2.3 | 56.5*  | 2.4 |
| <i>Suclg2</i>      | 8.4   | 0.1 | 8.6   | 0.3  | 7.1    | 0.3 | 7.0    | 0.4 |
| <i>Sdha</i>        | 63.4  | 2.0 | 67.6  | 2.1  | 51.0*  | 2.4 | 55.9*  | 2.3 |
| <i>Shdb</i>        | 42.2  | 1.7 | 46.7  | 3.2  | 37.8   | 2.6 | 42.4   | 2.3 |
| <i>Mdh1</i>        | 61.2  | 2.5 | 62.3  | 5.0  | 49.5   | 5.0 | 51.3   | 3.0 |
| <i>Mdh2</i>        | 112.7 | 4.1 | 116.0 | 5.1  | 94.8   | 4.5 | 103.2  | 4.4 |
| <b>Lipogenesis</b> |       |     |       |      |        |     |        |     |
| <i>Acly</i>        | 1.7   | 0.2 | 4.3   | 2.0  | 2.2    | 0.4 | 1.6    | 0.1 |
| <i>Acacb</i>       | 28.7  | 1.4 | 25.6  | 1.9  | 23.5   | 0.7 | 21.6   | 1.6 |
| <i>Fasn</i>        | 3.2   | 1.1 | 15.9  | 10.4 | 3.9    | 1.1 | 2.7    | 0.7 |

Gene expression levels (RPKM) in gastrocnemius muscles of freely fed control and SKM-Rictor-KO mice consuming regular or clenbuterol water for 5 days (n=5/group).

\*Adjusted p<0.05, for clenbuterol effect compared to regular water treatment in the indicated genotype (DeSeq2, two-tailed Wald test).

**Supplementary Table 2. Antibodies, chemicals, assay kits, and mouse lines used in this study**

| Reagent or Resource                               | Source                               | Identifier         |
|---------------------------------------------------|--------------------------------------|--------------------|
| <b>Antibodies</b> (Dilution used in parentheses)  |                                      |                    |
| Glycogen Synthase (15B1) Rabbit mAb               | Cell Signaling Technology            | 3886 (1:1000)      |
| Phospho-Glycogen Synthase (Ser641) antibody       | Cell Signaling Technology            | 3891 (1:1000)      |
| AMPK $\alpha$ antibody                            | Cell Signaling Technology            | 2532 (1:1000)      |
| Phospho-AMPK $\alpha$ (Thr172) (D4D6D) Rabbit mAb | Cell Signaling Technology            | 50081 (1:1000)     |
| GAPDH (14C10) Rabbit mAb (HRP Conjugate)          | Cell Signaling Technology            | 3683 (1:1000)      |
| Akt antibody                                      | Cell Signaling Technology            | 9272 (1:1000)      |
| Phospho-Akt (Ser473) antibody                     | Cell Signaling Technology            | 9271 (1:1000)      |
| Phospho-Akt (Thr308) (C31E5E) Rabbit mAb          | Cell Signaling Technology            | 2965 (1:1000)      |
| GSK-3 $\beta$ (27C10) Rabbit mAb                  | Cell Signaling Technology            | 9315 (1:1000)      |
| Phospho-GSK-3 $\beta$ (Ser9) antibody             | Cell Signaling Technology            | 9336 (1:1000)      |
| mTOR (7C10) Rabbit mAb                            | Cell Signaling Technology            | 2983 (1:1000)      |
| Phospho-mTOR (Ser2481) antibody                   | Cell Signaling Technology            | 2974 (1:1000)      |
| Glut1 Rabbit Antibody                             | Novus Biologicals                    | NB110-39113        |
| GLUT4 Polyclonal Antibody                         | ThermoFisher Scientific              | PA5-23052 (1:1000) |
| G $\alpha_s$ -specific antibody                   | Kindly provided by Dr. Lee Weinstein | (1:3000)           |
| Anti-mouse IgG, HRP-linked antibody               | Cell Signaling Technology            | 7076 (1:3000)      |
| Anti-rabbit IgG, HRP-linked antibody              | Cell Signaling Technology            | 7074 (1:3000)      |
| <b>Chemicals</b>                                  |                                      |                    |
| Tamoxifen                                         | Sigma-Aldrich                        | T5648              |
| D-glucose, anhydrous, granular                    | Macron Fine Chemicals                | 4912-12            |
| Insulin (Humulin R U-100)                         | Eli Lilly                            |                    |
| Clenbuterol                                       | Sigma-Aldrich                        | C5423              |
| cOmplete, EDTA-free Protease Inhibitor Cocktail   | Sigma-Aldrich (Roche)                | 11873580001        |

|                                                                    |                                       |                 |
|--------------------------------------------------------------------|---------------------------------------|-----------------|
| Phospho-STOP                                                       | Sigma-Aldrich (Roche)                 | 04906837001     |
| Streptozotocin                                                     | Sigma-Aldrich                         | S0130           |
| Corn oil                                                           | Sigma-Aldrich                         | C8267           |
| ECL western blotting substrate                                     | Pierce                                | 32106           |
| Trizol                                                             | Invitrogen                            | 15596018        |
| SuperScript™ III First-Strand Synthesis SuperMix                   | Invitrogen                            | 18080400        |
| Power SYBR Green PCR Master Mix                                    | Applied Biosystems                    | 4367659         |
| RIPA buffer                                                        | Sigma-Aldrich                         | R0278           |
| NuPAGE™ 4-12% Bis-Tris Gel                                         | Invitrogen                            | NP0336BOX       |
| NuPAGE™ 3-8% Tris-Acetate Gel                                      | Invitrogen                            | EA03785BOX      |
| Tris Buffered Saline (TBS), 10X, pH 7.4                            | Quality Biological                    | 351-086-101     |
| NuPAGE™ MOPS SDS Running Buffer (20X)                              | Invitrogen                            | NP0001          |
| NuPAGE™ Tris-Acetate SDS Running Buffer (20X)                      | Invitrogen                            | LA0041          |
| Deoxy-D-glucose, 2-[1-14C]-                                        | Perkin Elmer                          | NEC495          |
| Glucose, D-[3-3H]-                                                 | Perkin Elmer                          | NET331C         |
| Sodium Palmitate (U-13C16)                                         | Cambridge Isotope Laboratories, Inc.  | CLM-6059-PK     |
| R-2-Bromopalmitic acid [9,10-3H]                                   | American Radiolabeled Chemicals, Inc. | ART 1270-50 µCi |
| <b>Commercial Assays</b>                                           |                                       |                 |
| Ultra Sensitive Mouse Insulin ELISA Kit                            | Crystal Chem                          | 90080           |
| Glycogen Assay Kit                                                 | Cayman Chemical                       | 700480          |
| BCA protein assay                                                  | Pierce                                | 23225           |
| RNeasy mini kit                                                    | Qiagen                                | 74104           |
| Agilent RNA 600 nano kit                                           | Agilent Technologies                  | 5067-1511       |
| Agilent High Sensitivity DNA Kit                                   | Agilent Technologies                  | 5067-4626       |
| NEBNext® Ultra™ II RNA Library Prep with Sample Purification Beads | New England Biolabs                   | E7775S          |
| NEBNext® Poly(A) mRNA Magnetic Isolation Module                    | New England Biolabs                   | E7490           |

|                                                                         |                                          |                             |
|-------------------------------------------------------------------------|------------------------------------------|-----------------------------|
| NEBNext® Multiplex Oligos for Illumina® (Index Primers Set 1 and Set 2) | New England Biolabs                      | E7335, E7500                |
| <b>Experimental Models: Organisms/Strains</b>                           |                                          |                             |
| C57BL/6N mice                                                           | Taconic                                  | C57BL/6NTac, B6-M, DIO-B6-M |
| Floxed <i>Adrb2</i>                                                     | Mice provided by Dr. Gerard Karsenty     | REF <sup>1</sup>            |
| Floxed <i>Gnas (Ga<sub>s</sub>)</i>                                     | Mice provided by Dr. Lee Weinstein       | REF <sup>2</sup>            |
| <i>Rictor<sup>flox/flox</sup>, HSA-Cre</i>                              | Mice provided by Prof. Markus Rüegg      | REF <sup>3</sup>            |
| <i>FloxSTOP-Gs-DREADD</i> knock-in                                      | Mice provided by Dr. Rebecca Berdeaux    | REF <sup>4</sup>            |
| <i>HSA-Cre-ER<sup>T2</sup></i>                                          | Mice provided by Dr. Daniel Metzger      | REF <sup>5</sup>            |
| MCK-AMPK-DN                                                             | Mice provided by Dr. Henriette van Praag | REF <sup>6</sup>            |

- 1 Shi, Y. *et al.* Dissociation of the neuronal regulation of bone mass and energy metabolism by leptin in vivo. *Proc Natl Acad Sci U S A* **105**, 20529-20533, doi:10.1073/pnas.0808701106 (2008).
- 2 Chen, M. *et al.* G(s)alpha deficiency in skeletal muscle leads to reduced muscle mass, fiber-type switching, and glucose intolerance without insulin resistance or deficiency. *Am J Physiol Cell Physiol* **296**, C930-940, doi:10.1152/ajpcell.00443.2008 (2009).
- 3 Kleinert, M. *et al.* mTORC2 and AMPK differentially regulate muscle triglyceride content via Perilipin 3. *Mol Metab* **5**, 646-655, doi:10.1016/j.molmet.2016.06.007 (2016).
- 4 Akhmedov, D. *et al.* Gs-DREADD Knock-In Mice for Tissue-Specific, Temporal Stimulation of Cyclic AMP Signaling. *Mol Cell Biol* **37**, doi:10.1128/MCB.00584-16 (2017).
- 5 Schuler, M., Ali, F., Metzger, E., Chambon, P. & Metzger, D. Temporally controlled targeted somatic mutagenesis in skeletal muscles of the mouse. *Genesis (New York, N.Y. : 2000)* **41**, 165-170, doi:10.1002/gene.20107 (2005).

- 6 Mu, J., Brozinick, J. T., Jr., Valladares, O., Bucan, M. & Birnbaum, M. J. A role for AMP-activated protein kinase in contraction- and hypoxia-regulated glucose transport in skeletal muscle. *Mol Cell* **7**, 1085-1094 (2001).
