# Supplementary material for: Clenbuterol exerts antidiabetic activity through metabolic reprogramming of skeletal muscle cells
Source: PubMed Central journal article supplement (PMC8748640; doi:10.1038/s41467-021-27540-w), 2022-01-10
Supplement: 41467_2021_27540_MOESM2_ESM.pdf [file 41467_2021_27540_MOESM2_ESM.pdf]

### **Description of Additional Supplementary Files**

File Name: Supplementary Data 1

Description: Heatmap with fold changes of all detected metabolites in SKM of clenbuterol-treated mice vs. control mice
